# Supplementary material
Source: MDPI journal article supplement (https://www.mdpi.com/2071-1050/13/19/10914)
Supplement: s1 [file s1]

Archive with 10 entries (10 files):
- AHP and Fuzzy AHP Flow Diagram.pdf
- AHP Data Analysis.xlsx
- AHP Normalized Pairwise Matrix.csv
- AHP Priorities by alternative.csv
- Fuzzy AHP Data Analysis.xlsm
- Fuzzy AHP Priorities by alternative.csv
- Fuzzy TOPSIS.xlsx
- Needle Stick Injury.csv
- Python Seaborn Programming Visualization.pdf
- Sensitivity Analysis.pdf
