# Supplementary material
Source: MDPI journal article supplement (https://www.mdpi.com/2071-1050/13/19/10914)
Supplement: s1 [file s1 › AHP Data Analysis.xlsx]

## Sheet: AHP design
	You are using the XLSTAT trial version. Number of days remaining until the trial expires: 14
	XLSTAT 2021.2.1.1123 - Designs for AHP analysis - Start time: 06/05/2021 at 00:27:56 / End time: 06/05/2021 at 00:27:59 / Microsoft Excel 16.013426
	Alternatives: Workbook = My Project Data.xlsx / Sheet = Sheet1 / Range = 'Sheet1'!$F$26:$F$33 / 7 rows and 1 column
	Criteria: Workbook = My Project Data.xlsx / Sheet = Sheet1 / Range = 'Sheet1'!$E$26:$E$35 / 9 rows and 1 column
	Evaluators' labels: Workbook = My Project Data.xlsx / Sheet = Sheet1 / Range = 'Sheet1'!$G$26:$G$27 / 1 row and 1 column
	Number of evaluators: 1
	Number of alternatives: 7
	Criteria level: 1
	Number of criteria: 9
	Summary table:
	Criteria	Alternatives	Evaluators
	M1	H1	Mmemek
	M2	H2
	M3	H3
	M4	H4
	M5	H5
	M6	H6
	M7	H7
	M8
	M9
	Table of Saaty:
	Value	Definition	Comments
	1	Equal importance	Two elements contribute equally to the objective
	3	Moderate importance	Judgment slightly favors one element over another
	5	Strong importance	Judgment strongly favors one element over another
	7	Very strong importance	Judgment strongly favors one element over another, its dominance is demonstrated by experience
	9	Extreme importance	The dominance of one element over another is demonstrated and absolute
	2, 4, 6, 8	can be used to express intermediate values
	Reciprocity	If the element i has one of the above non-zero numbers assigned to it when compared with element j, then j has the reciprocal value when compared with i.
	Use the Saaty table values to evaluate the set of comparison matrices below.
	A value x of Saaty on the line i and the column j of a matrix means that the element i has an importance of the value x over the element j. On the contrary, the element of line j and column i has a value of 1/x.
	Only cells above the diagonal must be entered.
	Comparative matrices of evaluator Mmemek:
	On criteria:
	Criteria	M1	M2	M3	M4	M5	M6	M7	M8	M9
	M1	1	2	3	3	1	2	1	3	1
	M2	0.5	1	3	1	1	0.333333	1	2	2
	M3	0.333333	0.333333	1	2	0.333333	1	1	1	1
	M4	0.333333	1	0.5	1	1	0.333333	0.333333	0.333333	2
	M5	1	1	3	1	1	3	1	1	2
	M6	0.5	3	1	3	0.333333	1	3	2	2
	M7	1	1	1	3	1	0.333333	1	2	1
	M8	0.333333	0.5	1	3	1	0.5	0.5	1	2
	M9	1	0.5	1	0.5	0.5	0.5	1	0.5	1
	Alternatives for criterion M1:			Segregation						Alternatives for criterion M2:			Budget Operational Cost						Alternatives for criterion M3:			Waste Treatment						Alternatives for criterion M4:			Waste Transportation						Alternatives for criterion M5:			Waste Disposal						Alternatives for criterion M6:			Environmental Public Health and Occupational Safety Process
	Alternatives	H1	H2	H3	H4	H5	H6	H7		Alternatives	H1	H2	H3	H4	H5	H6	H7		Alternatives	H1	H2	H3	H4	H5	H6	H7		Alternatives	H1	H2	H3	H4	H5	H6	H7		Alternatives	H1	H2	H3	H4	H5	H6	H7		Alternatives	H1	H2	H3
	H1	1	1	3	3	2	3	3		H1	1	2	2	2	3	3	2		H1	1	1	2	1	1	2	2		H1	1	1	0.333333	2	3	3	3		H1	1	1	0.5	2	3	3	3		H1	1	1	2
	H2	1	1	2	3	5	2	1		H2	0.5	1	2	1	2	2	3		H2	1	1	1	2	1	1	2		H2	1	1	0.5	2	2	3	3		H2	1	1	0.333333	2	3	3	3		H2	1	1	2
	H3	0.333333	0.5	1	1	2	3	1		H3	0.5	0.5	1	3	2	1	2		H3	0.5	1	1	5	5	3	4		H3	3	2	1	3	3	3	3		H3	2	3	1	2	3	3	3		H3	0.5	0.5	1
	H4	0.333333	0.333333	1	1	1	2	3		H4	0.5	1	0.333333	1	3	3	4		H4	1	0.5	0.2	1	2	2	2		H4	0.5	0.5	0.333333	1	3	3	3		H4	0.5	0.5	0.5	1	3	3	3		H4	0.5	0.333333	0.333333
	H5	0.5	0.2	0.5	1	1	2	1		H5	0.333333	0.5	0.5	0.333333	1	2	2		H5	1	1	0.2	0.5	1	1	1		H5	0.333333	0.5	0.333333	0.333333	1	1	1		H5	0.333333	0.333333	0.333333	0.333333	1	2	2		H5	1	1	0.333333
	H6	0.333333	0.5	0.333333	0.5	0.5	1	1		H6	0.333333	0.5	1	0.333333	0.5	1	1		H6	0.5	1	0.333333	0.5	1	1	1		H6	0.333333	0.333333	0.333333	0.333333	1	1	1		H6	0.333333	0.333333	0.333333	0.333333	0.5	1	1		H6	1	0.5	0.333333
	H7	0.333333	1	1	0.333333	1	1	1		H7	0.5	0.333333	0.5	0.25	0.5	1	1		H7	0.5	0.5	0.25	0.5	1	1	1		H7	0.333333	0.333333	0.333333	0.333333	1	1	1		H7	0.333333	0.333333	0.333333	0.333333	0.5	1	1		H7	0.5	1	0.5
	Once you have completed the matrices you can click the button above to start the AHP analysis
[truncated: 28 more columns]

## Sheet: AHP
	You are using the XLSTAT trial version. Number of days remaining until the trial expires: 14
	XLSTAT 2021.2.1.1123 - Analytic Hierarchy Process analysis - Start time: 10/05/2021 at 20:20:48 / End time: 10/05/2021 at 20:20:51 / Microsoft Excel 16.013426
	Number of evaluators: 1
	Number of alternatives: 7
	Criteria level: 1
	Number of criteria: 9
	IC : Consistency index; RC : Consistency ratio
	Mean priorities by criterion:
	Criteria	%
	M1	16.7465
	M2	11.3457
	M3	7.55259
	M4	6.92508
	M5	14.698
	M6	15.2829
	M7	11.2153
	M8	9.01171
	M9	7.2222
	Mean priorities by alternative:
	Crit./Alt.	H1	H2	H3	H4	H5	H6	H7
	M1	4.24208	3.93956	2.09893	2.08368	1.54694	1.16788	1.66745
	M2	2.84461	1.98931	1.8061	1.98874	1.06556	0.875807	0.7756
	M3	1.36385	1.15201	2.084	0.974127	0.741668	0.67245	0.564496
	M4	1.25847	1.23988	2.05565	0.98516	0.481371	0.452274	0.452274
	M5	2.78202	2.67704	4.12481	2.16716	1.2073	0.869848	0.869848
	M6	2.76409	2.89098	3.0221	1.85448	1.82734	1.30622	1.61766
	M7	2.13486	1.26679	0.911623	2.85102	1.14731	2.07479	0.828876
	M8	1.92128	1.59211	1.26999	1.69964	1.05284	0.862154	0.613696
	M9	1.8091	1.63562	0.914935	0.86905	0.678019	0.654	0.661475
		21.1204	18.3833	18.2881	15.4731	9.74835	8.93542	8.05138
	Results obtained from the ratings of evaluator Mmemek:
	Priorities by criterion:
	Criteria	%
	M1	16.7465
	M2	11.3457
	M3	7.55259
	M4	6.92508
	M5	14.698
	M6	15.2829
	M7	11.2153
	M8	9.01171
	M9	7.2222
	IC = 0.143 ; RC = 9.86%
	Priorities by alternative:
	Crit./Alt.	H1	H2	H3	H4	H5	H6	H7	IC	RC
	M1	4.24208	3.93956	2.09893	2.08368	1.54694	1.16788	1.66745	0.0937832	7.10479
	M2	2.84461	1.98931	1.8061	1.98874	1.06556	0.875807	0.7756	0.10042	7.6076
	M3	1.36385	1.15201	2.084	0.974127	0.741668	0.67245	0.564496	0.109974	8.33137
	M4	1.25847	1.23988	2.05565	0.98516	0.481371	0.452274	0.452274	0.0457667	3.46717
	M5	2.78202	2.67704	4.12481	2.16716	1.2073	0.869848	0.869848	0.0527434	3.99571
	M6	2.76409	2.89098	3.0221	1.85448	1.82734	1.30622	1.61766	0.123797	9.37857
	M7	2.13486	1.26679	0.911623	2.85102	1.14731	2.07479	0.828876	0.0750029	5.68204
	M8	1.92128	1.59211	1.26999	1.69964	1.05284	0.862154	0.613696	0.131105	9.93219
	M9	1.8091	1.63562	0.914935	0.86905	0.678019	0.654	0.661475	0.13057	9.89167
