# Supplementary material
Source: MDPI journal article supplement (https://www.mdpi.com/2071-1050/13/19/10914)
Supplement: s1 [file s1 › AHP Normalized Pairwise Matrix.csv]

Criteria	M1	M2	M3	M4	M5	M6	M7	M8	M9
M1	0.1667	0.1935	0.2069	0.1714	0.1395	0.2222	0.1017	0.2338	0.0714
M2	0.0833	0.0968	0.2069	0.0571	0.1395	0.037	0.1017	0.1558	0.1429
M3	0.0556	0.0323	0.069	0.1143	0.0465	0.1111	0.1017	0.0779	0.0714
M4	0.0556	0.0968	0.0345	0.0571	0.1395	0.037	0.0339	0.026	0.1429
M5	0.1667	0.0968	0.2069	0.0571	0.1395	0.3333	0.1017	0.0779	0.1429
M6	0.0833	0.2903	0.069	0.1714	0.0465	0.1111	0.3051	0.1558	0.1429
M7	0.1667	0.0968	0.069	0.1714	0.1395	0.037	0.1017	0.1558	0.0714
M8	0.0556	0.0484	0.069	0.1714	0.1395	0.0556	0.0508	0.0779	0.1429
M9	0.1667	0.0484	0.069	0.0286	0.0698	0.0556	0.1017	0.039	0.0714
