# Supplementary material
Source: MDPI journal article supplement (https://www.mdpi.com/2071-1050/13/19/10914)
Supplement: s1 [file s1 › AHP Priorities by alternative.csv]

Criteria	H1	H2	H3	H4	H5	H6	H7
M1	4.24208111	3.93955686	2.098932322	2.083680796	1.546941698	1.167882387	1.667447086
M2	2.844609123	1.989307352	1.806096477	1.988740633	1.065563202	0.875806646	0.775599572
M3	1.363845092	1.152005832	2.083998603	0.974127087	0.741667826	0.672450234	0.56449594
M4	1.258471973	1.239876175	2.055647366	0.985159557	0.481371315	0.45227436	0.45227436
M5	2.782022062	2.67703614	4.124814035	2.167156957	1.207303147	0.869848397	0.869848397
M6	2.764092134	2.890982919	3.022099639	1.854479757	1.827339576	1.306216948	1.617664429
M7	2.1348589	1.266793771	0.911623402	2.851020451	1.147310385	2.074789121	0.828876328
M8	1.921280063	1.592108802	1.269989618	1.699643487	1.052837963	0.862153682	0.613695927
M9	1.80910092	1.635622936	0.914935462	0.86904971	0.678018856	0.653999569	0.661475128
