# Supplementary material
Source: MDPI journal article supplement (https://www.mdpi.com/2071-1050/13/19/10914)
Supplement: s1 [file s1 › Fuzzy AHP Data Analysis.xlsm]

## Sheet: Fuzzy AHP
	M1			M2			M3			M4			M5			M6			M7			M8			M9
M1	1	1	1
M2				1	1	1
M3							1	1	1
M4										1	1	1
M5													1	1	1
M6																1	1	1
M7																			1	1	1
M8																						1	1	1
M9																									1	1	1
								1
	M1			M2			M3			M4			M5			M6			M7			M8			M9
M1	1	1	1	1	2	3	2	3	4	2	3	4	1	1	1	1	2	3	1	1	1	2	3	4	1	1	1
M2	0.333333	0.5	1	1	1	1	2	3	4	1	1	1	1	1	1	0.25	0.333333	0.5	1	1	1	1	2	3	1	2	3
M3	0.25	0.333333	0.5	0.25	0.333333	0.5	1	1	1	1	2	3	0.25	0.333333	0.5	1	1	1	1	1	1	1	1	1	1	1	1
M4	0.25	0.333333	0.5	1	1	1	0.333333	0.5	1	1	1	1	1	1	1	0.25	0.333333	0.5	0.25	0.333333	0.5	0.25	0.333333	0.5	1	2	3
M5	1	1	1	1	1	1	2	3	4	1	1	1	1	1	1	2	3	4	1	1	1	1	1	1	1	2	3
M6	0.333333	0.5	1	2	3	4	1	0.5	1	2	3	4	0.25	0.333333	0.5	1	1	1	2	3	4	1	2	3	1	2	3
M7	1	1	1	1	1	1	1	3	4	2	3	4	1	1	1	0.25	0.333333	0.5	1	1	1	1	2	3	1	1	1
M8	0.25	0.333333	0.5	0.333333	0.5	1	1	0.5	1	2	3	4	1	1	1	0.333333	0.5	1	0.333333	0.5	1	1	1	1	1	2	3
M9	1	1	1	0.333333	0.5	1	1	1	1	0.333333	0.5	1	0.333333	0.5	1	0.333333	0.5	1	1	1	1	0.333333	0.5	1	1	1	1
		1
																	Geometric Mean							Fuzzy Weight			Weights	Normalized Weights		*100
																M1	1.25992	1.68243	2.02635				M1	0.103361	0.177571	0.273062	0.184665	0.170387		17.0387
																M2	0.819481	1.08006	1.37872				M2	0.0672286	0.113995	0.18579	0.122338	0.112879		11.2879
																M3	0.629961	0.748872	0.896747				M3	0.0516807	0.0790394	0.120842	0.0838541	0.0773706		7.73706
					1											M4	0.477974	0.613686	0.830276				M4	0.039212	0.0647713	0.111885	0.071956	0.0663924		6.63924
																M5	1.16653	1.37872	1.53746				M5	0.0956997	0.145516	0.207182	0.149466	0.13791		13.791
																M6	0.955948	1.27652	1.87614				M6	0.0784241	0.13473	0.252821	0.155325	0.143316		14.3316
																M7	0.925875	1.22028	1.4235				M7	0.0759569	0.128795	0.191825	0.132192	0.121971		12.1971
																M8	0.641966	0.793701	1.22028				M8	0.0526656	0.0837709	0.164441	0.100292	0.0925379		9.25379
																M9	0.543166	0.680395	1				M9	0.0445603	0.0718121	0.134756	0.0837095	0.0772371		7.72371
																Total	7.42082	9.47466	12.1895				Total				1.0838	1
																Reverse	0.134756	0.105545	0.082038
																Increasing Order	0.082038	0.105545	0.134756
