# Supplementary material
Source: MDPI journal article supplement (https://www.mdpi.com/2071-1050/13/19/10914)
Supplement: s1 [file s1 › Fuzzy AHP Priorities by alternative.csv]

Criteria	H1	H2	H3	H4	H5	H6	H7
M1	0.044241259	0.037934453	0.02205665	0.020453136	0.016181122	0.014373747	0.015146514
M2	0.028926073	0.020549476	0.017358882	0.018601931	0.011290302	0.008091064	0.008061052
M3	0.013358463	0.012018045	0.021123538	0.010108408	0.007330507	0.006949281	0.006482339
M4	0.011989288	0.01225432	0.01921638	0.00959182	0.004675302	0.004332666	0.004332666
M5	0.026477859	0.024498931	0.037209833	0.021252997	0.011119741	0.008986294	0.008363873
M6	0.025277702	0.026773797	0.029861709	0.017244597	0.016696646	0.01230972	0.015151369
M7	0.023622475	0.013104337	0.010473275	0.031375703	0.012129322	0.022297875	0.008968212
M8	0.019461421	0.017340384	0.01325214	0.016963336	0.010832127	0.007542541	0.007145961
M9	0.020036208	0.016655431	0.009988323	0.00925952	0.00759449	0.00773563	0.005967536
