# Supplementary material
Source: MDPI journal article supplement (https://www.mdpi.com/2071-1050/13/19/10914)
Supplement: s1 [file s1 › Fuzzy TOPSIS.xlsx]

## Sheet: Sheet1
Weightage Score	0.103	0.178	0.273	0.067	0.114	0.186	0.052	0.079	0.121	0.039	0.065	0.112	0.096	0.146	0.207	0.078	0.135	0.253	0.076	0.129	0.192	0.053	0.084	0.164	0.045	0.072	0.135
	M1			M2			M3			M4			M5			M6			M7			M8			M9
H1	0.150312	0.26439	0.430006	0.11352	0.264643	0.519413	0.107476	0.178471	0.26426	0.101927	0.184331	0.321469	0.102627	0.194513	0.364887	0.107012	0.184233	0.283626	0.0930853	0.187384	0.387686	0.0949661	0.222157	0.427589	0.148719	0.265108	0.438504
H2	0.136141	0.229415	0.358735	0.0878839	0.185563	0.364203	0.107476	0.161646	0.225877	0.0961904	0.184331	0.340639	0.0984946	0.183566	0.330487	0.118151	0.195219	0.295525	0.0663773	0.110432	0.193843	0.0896216	0.193111	0.380816	0.129275	0.222821	0.356419
H3	0.078309	0.12782	0.215003	0.0751189	0.152224	0.311303	0.176333	0.271285	0.422418	0.151462	0.295175	0.527424	0.132564	0.277407	0.520388	0.105227	0.198532	0.375363	0.0484953	0.0820507	0.165688	0.0593045	0.135406	0.312397	0.0774791	0.128168	0.219252
H4	0.0751559	0.120627	0.194733	0.0931248	0.168069	0.316024	0.0711192	0.128443	0.216782	0.0744676	0.136957	0.274776	0.0749791	0.144523	0.311888	0.0679611	0.117002	0.207217	0.115398	0.26278	0.509275	0.0989502	0.185335	0.364834	0.0743595	0.120955	0.198582
H5	0.0572125	0.0919905	0.159747	0.0457855	0.0950609	0.209492	0.0711192	0.0954329	0.135376	0.043561	0.0689904	0.124435	0.0403993	0.0790381	0.15859	0.0750351	0.117002	0.187681	0.0601195	0.100021	0.182934	0.0569167	0.115738	0.241848	0.0581	0.0952282	0.169738
H6	0.0425087	0.0811759	0.150756	0.0457855	0.0666551	0.138625	0.0644143	0.0864358	0.135376	0.041807	0.0651078	0.112704	0.0345314	0.0622271	0.127926	0.0526133	0.0820399	0.145297	0.0893372	0.184257	0.357095	0.0471232	0.0747501	0.16675	0.0464361	0.0952282	0.187406
H7	0.0680705	0.0845815	0.136544	0.0379073	0.0677861	0.144441	0.0533308	0.0782869	0.135376	0.041807	0.0651078	0.112704	0.0345314	0.0587251	0.115866	0.0781831	0.105972	0.160421	0.0446686	0.0730753	0.135919	0.039909	0.0735029	0.160036	0.0552489	0.0724926	0.126115
	M1			M2			M3			M4			M5			M6			M7			M8			M9
H1	0.349557	0.614852	1	0.218555	0.509503	1	0.254431	0.422499	0.625591	0.193254	0.349493	0.609507	0.197212	0.373785	0.701183	0.28509	0.490813	0.755605	0.18278	0.367942	0.761251	0.222097	0.519556	1	0.339151	0.604574	1
H2	0.316602	0.533516	0.834255	0.169199	0.357255	0.701183	0.254431	0.382668	0.534724	0.182378	0.349493	0.645854	0.189272	0.352749	0.635078	0.314765	0.520082	0.787305	0.130337	0.216842	0.380626	0.209597	0.451627	0.890611	0.294809	0.508138	0.812807
H3	0.182111	0.297253	0.5	0.144623	0.293069	0.599337	0.417437	0.642219	1	0.287174	0.559653	1	0.254741	0.533078	1	0.280333	0.528907	1	0.0952242	0.161113	0.32534	0.138695	0.316673	0.7306	0.17669	0.292284	0.5
H4	0.174779	0.280524	0.452862	0.179289	0.323574	0.608426	0.168362	0.304067	0.513194	0.141191	0.259672	0.520977	0.144083	0.277721	0.599337	0.181054	0.311704	0.552045	0.226592	0.51599	1	0.231414	0.433443	0.853236	0.169575	0.275835	0.452862
H5	0.133051	0.213928	0.371499	0.0881485	0.183016	0.403324	0.168362	0.225921	0.32048	0.0825919	0.130806	0.235931	0.0776331	0.151883	0.304753	0.1999	0.311704	0.5	0.118049	0.196399	0.359205	0.133111	0.270677	0.565608	0.132496	0.217166	0.387084
H6	0.0988562	0.188778	0.350591	0.0881485	0.128328	0.266888	0.15249	0.204622	0.32048	0.0792664	0.123445	0.213688	0.066357	0.119578	0.245829	0.140167	0.218562	0.387084	0.175421	0.361803	0.701183	0.110207	0.174818	0.389977	0.105897	0.217166	0.427376
H7	0.158301	0.196698	0.317539	0.0729811	0.130505	0.278085	0.126251	0.185331	0.32048	0.0792664	0.123445	0.213688	0.066357	0.112849	0.222653	0.208287	0.282318	0.427376	0.0877103	0.143489	0.266888	0.0933349	0.171901	0.374275	0.125994	0.165318	0.287603
	M1			M2			M3			M4			M5			M6			M7			M8			M9
H1	0.0360044	0.109444	0.273	0.0146432	0.0580834	0.186	0.0132304	0.0333774	0.0756965	0.0075369	0.022717	0.0682648	0.0189324	0.0545726	0.145145	0.022237	0.0662597	0.191168	0.0138913	0.0474645	0.14616	0.0117711	0.0436427	0.164	0.0152618	0.0435294	0.135
H2	0.0326101	0.0949658	0.227752	0.0113363	0.0407271	0.13042	0.0132304	0.0302307	0.0647017	0.00711273	0.022717	0.0723357	0.0181701	0.0515014	0.131461	0.0245517	0.0702111	0.199188	0.00990561	0.0279726	0.0730801	0.0111087	0.0379367	0.14606	0.0132664	0.036586	0.109729
H3	0.0187575	0.0529109	0.1365	0.00968972	0.0334099	0.111477	0.0217067	0.0507353	0.121	0.0111998	0.0363775	0.112	0.0244551	0.0778294	0.207	0.021866	0.0714025	0.253	0.00723704	0.0207836	0.0624653	0.00735084	0.0266005	0.119818	0.00795104	0.0210444	0.0675
H4	0.0180022	0.0499332	0.123631	0.0120123	0.0368875	0.113167	0.00875484	0.0240213	0.0620965	0.00550646	0.0168787	0.0583494	0.013832	0.0405473	0.124063	0.0141222	0.0420801	0.139667	0.017221	0.0665626	0.192	0.012265	0.0364092	0.139931	0.00763089	0.0198601	0.0611363
H5	0.0137042	0.0380793	0.101419	0.00590595	0.0208638	0.0750182	0.00875484	0.0178477	0.0387781	0.00322109	0.00850242	0.0264242	0.00745278	0.0221749	0.063084	0.0155922	0.0420801	0.1265	0.00897175	0.0253354	0.0689673	0.00705487	0.0227369	0.0927596	0.00596232	0.015636	0.0522564
H6	0.0101822	0.0336026	0.0957115	0.00590595	0.0146294	0.0496412	0.00792946	0.0161651	0.0387781	0.00309139	0.00802392	0.023933	0.00637027	0.0174584	0.0508865	0.010933	0.0295058	0.0979323	0.013332	0.0466726	0.134627	0.00584096	0.0146847	0.0639562	0.00476535	0.015636	0.0576957
H7	0.016305	0.0350123	0.0866881	0.00488973	0.0148776	0.0517238	0.00656507	0.0146411	0.0387781	0.00309139	0.00802392	0.023933	0.00637027	0.0164759	0.0460891	0.0162464	0.0381129	0.108126	0.00666598	0.0185101	0.0512425	0.00494675	0.0144397	0.0613811	0.00566973	0.0119029	0.0388263
A+	0.0360044	0.109444	0.273	0.0146432	0.0580834	0.186	0.0217067	0.0507353	0.121	0.0111998	0.0363775	0.112	0.0244551	0.0778294	0.207	0.021866	0.0714025	0.253	0.017221	0.0665626	0.192	0.0117711	0.0436427	0.164	0.0152618	0.0435294	0.135
A-	0.0101822	0.0336026	0.0957115	0.00488973	0.0148776	0.0517238	0.00656507	0.0146411	0.0387781	0.00309139	0.00802392	0.023933	0.00637027	0.0164759	0.0460891	0.010933	0.0295058	0.0979323	0.00666598	0.0185101	0.0512425	0.00494675	0.0144397	0.0613811	0.00566973	0.0119029	0.0388263
	M1			M2			M3			M4			M5			M6			M7			M8			M9			di+
H1	0			0			0.0487612			0.0458677			0.0661597			0.0620459			0.0496962			0			0			0.272531
H2	0.0475485			0.0582582			0.0601156			0.0420171			0.0800778			0.0538473			0.125096			0.0188292			0.0262329			0.512023
H3	0.148079			0.0785537			0			0			0			0			0.137507			0.0474232			0.0712716			0.482834
H4	0.161123			0.0758695			0.065109			0.0571786			0.0911381			0.11715			0			0.0251344			0.0776884			0.670391
H5	0.186276			0.117165			0.0888704			0.0901191			0.154614			0.129904			0.129844			0.0742944			0.0874836			1.05857
H6	0.193405			0.143204			0.0895478			0.0926371			0.167705			0.160752			0.0607644			0.104207			0.0824058			1.09463
H7	0.200951			0.141168			0.09022			0.0926371			0.172527			0.148685			0.148858			0.106766			0.101392			1.20321
	M1			M2			M3			M4			M5			M6			M7			M8			M9			di-
H1	0.193405			0.141168			0.0415791			0.0467737			0.106377			0.100431			0.0993234			0.106766			0.101392			0.937214
H2	0.146177			0.0829164			0.0304939			0.0506369			0.0925288			0.109414			0.023873			0.0879507			0.0752042			0.699195
H3	0.0453986			0.0626221			0.09022			0.0926371			0.172527			0.160752			0.0114555			0.0597054			0.0301244			0.725442
H4	0.0326587			0.065396			0.0251661			0.0355646			0.0817183			0.043627			0.148858			0.0816735			0.0237136			0.538376
H5	0.00753345			0.0240585			0.00344684			0.00253782			0.0179358			0.0313283			0.0190401			0.0324798			0.0139402			0.152301
H6	0			0.00217789			0.00171554			0			0.00489697			0			0.0880961			0.0026378			0.0192422			0.118767
H7	0.00979307			0			0			0			0			0.0136896			0			0			0			0.0234827
														di+	di-	di- + di+	Cci	Rank
													H1	0.272531	0.937214	1.20975	0.774721	1
													H2	0.512023	0.699195	1.21122	0.577266	3
													H3	0.482834	0.725442	1.20828	0.600394	2
													H4	0.670391	0.538376	1.20877	0.445393	4
													H5	1.05857	0.152301	1.21087	0.125778	5
													H6	1.09463	0.118767	1.21339	0.0978796	6
													H7	1.20321	0.0234827	1.22669	0.0191431	7
