# Supplementary material
Source: MDPI journal article supplement (https://www.mdpi.com/2071-1050/13/19/10914)
Supplement: s1 [file s1 › Needle Stick Injury.csv]

No	Gender	Needle Stick Injury	Health Facility
1	Female	0	H6
2	Male	0	H6
3	Male	0	H6
4	Male	3	H6
5	Female	2	H6
6	Female	0	H6
7	Female	1	H6
8	Female	0	H6
9	Female	0	H2
10	Male	0	H2
11	Female	0	H2
12	Female	0	H2
13	Female	3	H2
14	Female	4	H2
15	Female	3	H2
16	Female	0	H2
17	Male	0	H2
18	Female	0	H2
19	Female	1	H2
20	Female	1	H2
21	Female	0	H2
22	Female	3	H2
23	Female	0	H2
24	Male	0	H2
25	Female	0	H2
26	Female	0	H2
27	Female	0	H2
28	Female	1	H2
29	Female	1	H2
30	Female	6	H2
31	Male	0	H2
32	Female	0	H2
33	Female	0	H2
34	Female	3	H2
35	Female	3	H2
36	Female	0	H2
37	Female	2	H2
38	Male	0	H2
39	Female	0	H2
40	Female	0	H2
41	Female	0	H2
42	Female	0	H2
43	Female	1	H2
44	Female	7	H2
45	Male	1	H2
46	Female	0	H2
47	Female	0	H2
48	Female	0	H2
49	Female	2	H2
50	Female	2	H2
51	Female	0	H2
52	Male	1	H2
53	Male	0	H2
54	Male	0	H2
55	Male	0	H2
56	Male	0	H2
57	Male	0	H2
58	Male	4	H2
59	Male	3	H2
60	Female	0	H7
61	Female	0	H7
62	Female	3	H7
63	Female	0	H7
64	Female	1	H7
65	Female	0	H7
66	Female	2	H7
67	Male	1	H3
68	Female	1	H3
69	Female	0	H3
70	Female	0	H3
71	Female	2	H3
72	Female	1	H3
73	Female	6	H3
74	Female	0	H3
75	Female	0	H3
76	Female	0	H3
77	Female	1	H3
78	Male	1	H3
79	Female	2	H3
80	Female	0	H3
81	Female	0	H3
82	Female	0	H3
83	Female	1	H3
84	Female	1	H3
85	Female	1	H3
86	Female	0	H3
87	Female	0	H3
88	Female	0	H3
89	Female	2	H3
90	Male	2	H4
91	Female	0	H4
92	Female	0	H4
93	Female	0	H4
94	Female	1	H4
95	Female	1	H4
96	Male	0	H4
97	Female	0	H4
98	Female	0	H4
99	Female	2	H4
100	Female	3	H4
101	Female	0	H4
102	Male	0	H4
103	Female	0	H4
104	Female	1	H4
105	Female	1	H4
106	Female	0	H4
107	Female	0	H4
108	Male	0	H4
109	Male	2	H4
110	Male	2	H4
111	Male	0	H4
112	Male	0	H4
113	Female	0	H4
114	Female	2	H4
115	Female	1	H4
116	Female	0	H4
117	Female	0	H4
118	Male	0	H4
119	Male	3	H4
120	Female	4	H4
121	Female	0	H4
122	Female	0	H4
123	Female	0	H4
124	Female	6	H4
125	Male	1	H4
126	Male	0	H4
127	Female	0	H4
128	Female	0	H4
129	Female	1	H4
130	Female	1	H4
131	Female	0	H4
132	Male	0	H4
133	Female	0	H4
134	Male	2	H4
135	Female	1	H4
136	Female	0	H4
137	Male	0	H4
138	Female	0	H4
139	Female	1	H4
140	Female	2	H4
141	Male	0	H4
142	Female	0	H4
143	Female	0	H4
144	Female	1	H4
145	Male	1	H4
146	Female	0	H4
147	Female	0	H4
148	Female	0	H4
149	Female	2	H4
150	Female	1	H4
151	Male	0	H4
152	Male	0	H4
153	Female	0	H4
154	Female	2	H4
155	Female	1	H4
156	Female	0	H4
157	Female	0	H4
158	Female	0	H4
159	Female	3	H4
160	Female	2	H5
161	Female	6	H5
162	Female	2	H5
163	Female	0	H5
164	Male	0	H5
165	Female	0	H5
166	Male	0	H5
167	Female	1	H5
168	Female	2	H5
169	Female	6	H5
170	Female	4	H5
171	Female	0	H5
172	Male	0	H5
173	Female	0	H5
174	Male	0	H5
175	Female	1	H5
176	Female	1	H5
177	Female	3	H5
178	Female	2	H5
179	Female	0	H5
180	Male	0	H5
181	Female	0	H5
182	Male	0	H5
183	Female	1	H5
184	Male	1	H5
185	Male	6	H5
186	Female	5	H5
187	Female	0	H5
188	Female	0	H5
189	Female	0	H1
190	Female	0	H1
191	Female	1	H1
192	Female	2	H1
193	Female	6	H1
194	Female	4	H1
195	Female	0	H1
196	Female	0	H1
197	Female	0	H1
198	Female	0	H1
199	Female	1	H1
200	Female	6	H1
201	Female	6	H1
202	Female	3	H1
203	Female	0	H1
204	Female	0	H1
205	Female	0	H1
206	Female	0	H1
207	Female	1	H1
208	Female	6	H1
209	Female	7	H1
210	Female	3	H1
211	Female	0	H1
212	Female	0	H1
213	Female	0	H1
214	Female	0	H1
215	Female	1	H1
216	Female	1	H1
217	Female	6	H1
218	Female	3	H1
219	Female	0	H1
220	Female	0	H1
221	Female	0	H1
222	Female	0	H1
223	Female	1	H1
224	Male	1	H1
225	Male	6	H1
226	Male	3	H1
227	Male	0	H1
228	Male	0	H1
229	Male	0	H1
230	Male	0	H1
231	Male	1	H1
232	Female	1	H1
233	Male	6	H1
234	Male	3	H1
235	Male	0	H1
236	Male	0	H1
237	Male	0	H1
238	Male	0	H1
239	Female	3	H1
240	Female	1	H1
241	Female	6	H1
242	Female	2	H1
243	Male	0	H1
244	Female	0	H1
245	Male	0	H1
246	Female	0	H1
247	Male	1	H1
248	Female	1	H1
249	Male	6	H1
250	Female	2	H1
251	Female	0	H1
252	Male	1	H1
253	Male	7	H1
254	Female	2	H1
255	Male	0	H1
256	Female	0	H1
257	Female	0	H1
