# Supplementary material
Source: MDPI journal article supplement (https://www.mdpi.com/2071-1050/13/19/10914)

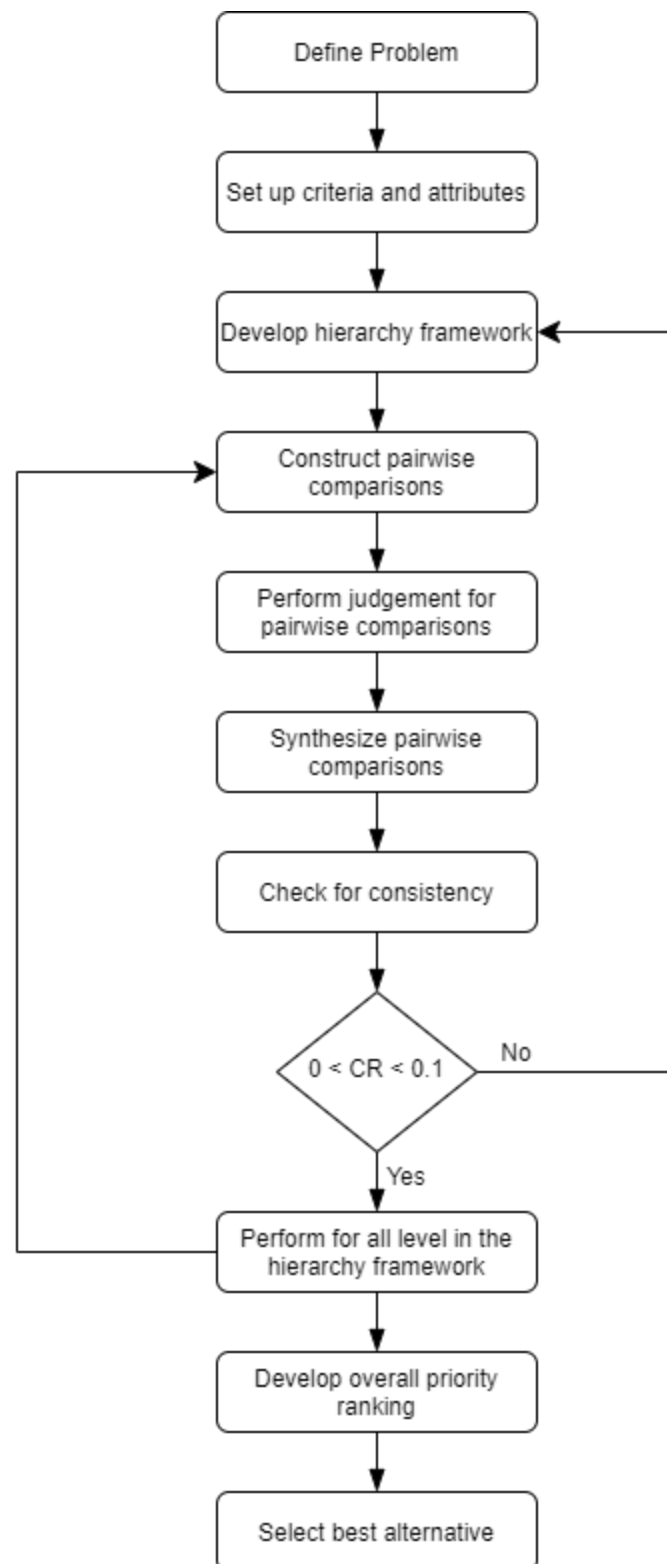

AHP Flow Diagram

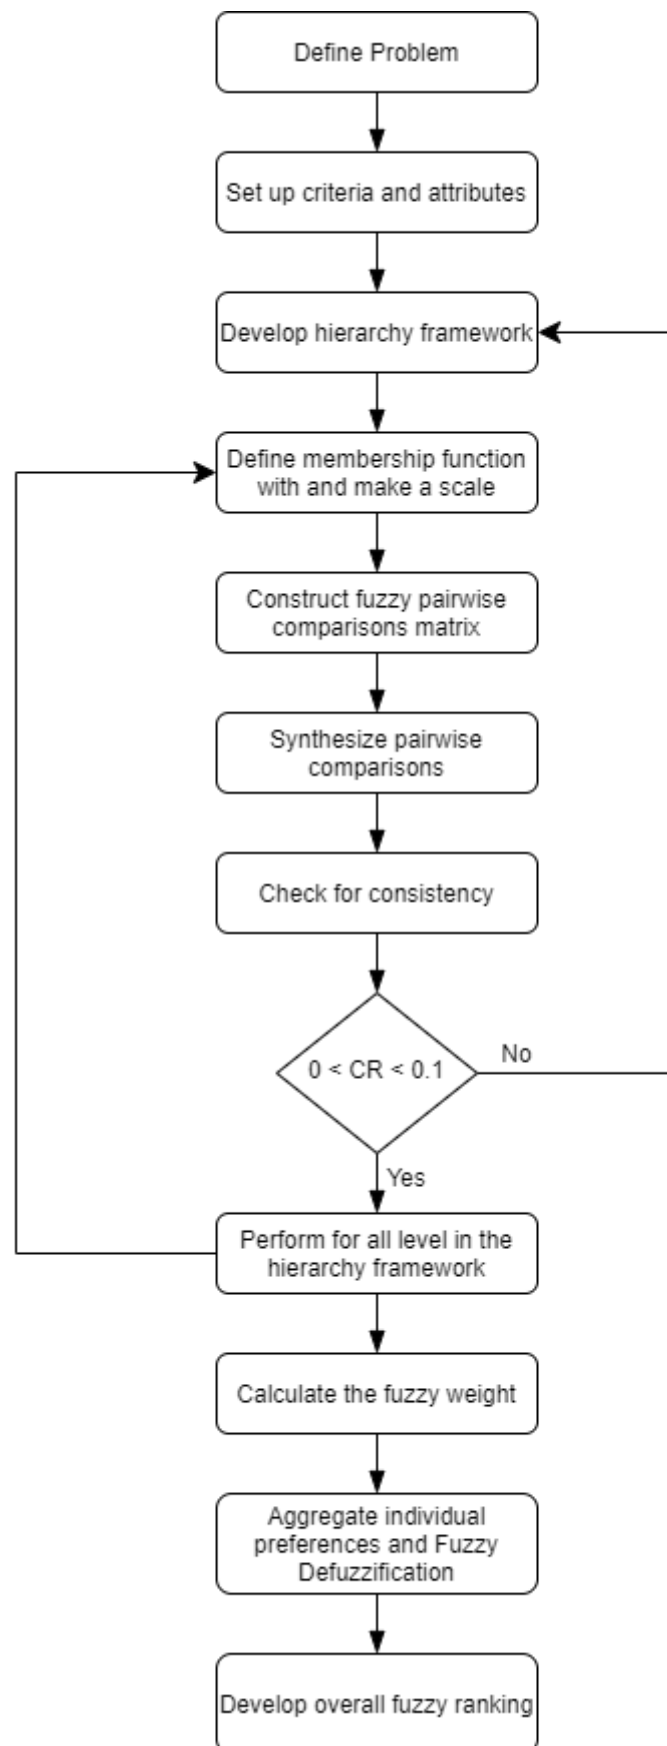

Fuzzy AHP Flow Diagram

Supplement: s1 [file s1]
